# Supplementary material for: Cell migration on microposts with surface coating and confinement
Source: PubMed Central journal article supplement (PMC6379512; doi:10.1042/bsr20181596), 2019-02-19

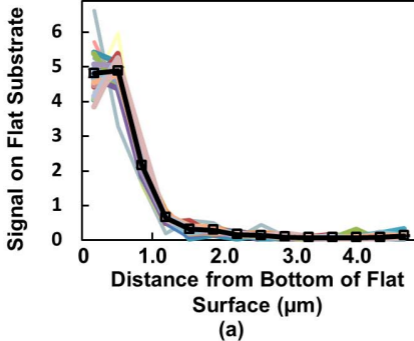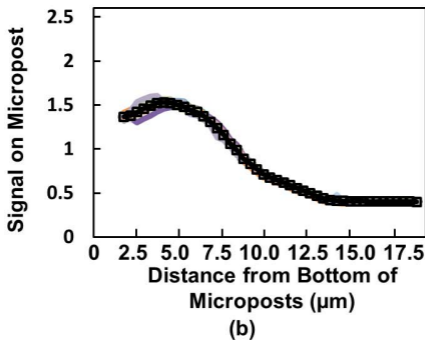

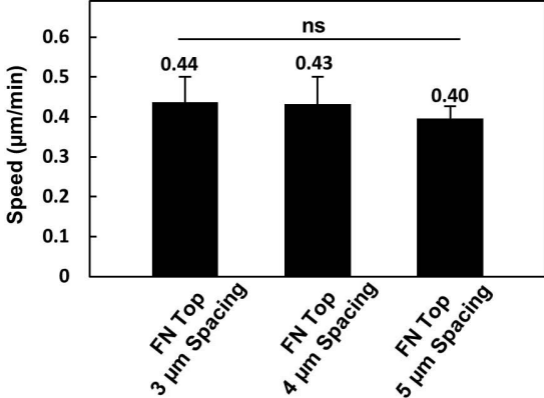

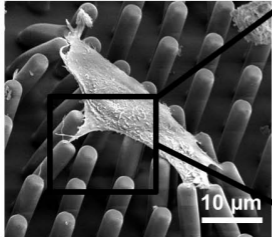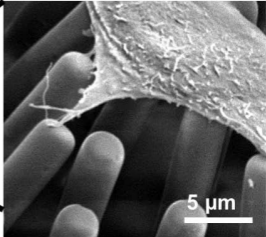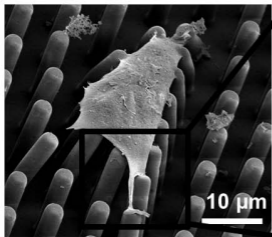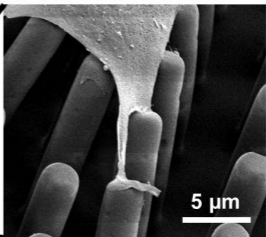

Supplement: bsr-39-bsr20181596_Supp1.pdf [file bsr-39-bsr20181596_Supp1.pdf]
